# Supplementary material
Source: MDPI journal article supplement (https://www.mdpi.com/2297-8739/8/10/164)
Supplement: s1 [file s1]

# Determination and Chemometrics-assisted Comparative Analysis of Active Components in Different Tissue of *Rana chensinensis*

Jianqiu Zhang <sup>1</sup>, Zhongyao Wang <sup>1</sup>, Shihan Wang <sup>2</sup>, Changli Zhang <sup>1</sup>, Nan Li <sup>1</sup>, Dongliang Xu <sup>1</sup>, Yong Yang <sup>1</sup>, and Yongsheng Wang <sup>1,\*</sup>

<sup>1</sup> School of Pharmaceutical Sciences, Jilin University, Changchun, Jilin 130021, China; jqzhang19@mails.jlu.edu.cn (J.Z.); zhongyao20@mails.jlu.edu.cn (Z.W.); clzhang20@mails.jlu.edu.cn (C.Z.); lin20@mails.jlu.edu.cn (N.L.); xudl19@mails.jlu.edu.cn (D.X.); yongyang@jlu.edu.cn (Y.Y.)

<sup>2</sup> College of Chinese Medicine Materials, Jilin Agricultural University, Changchun, Jilin 130118, China; shihanw@jlu.edu.cn (S.W.)

\* Correspondence: wys@jlu.edu.cn (Y.W.)

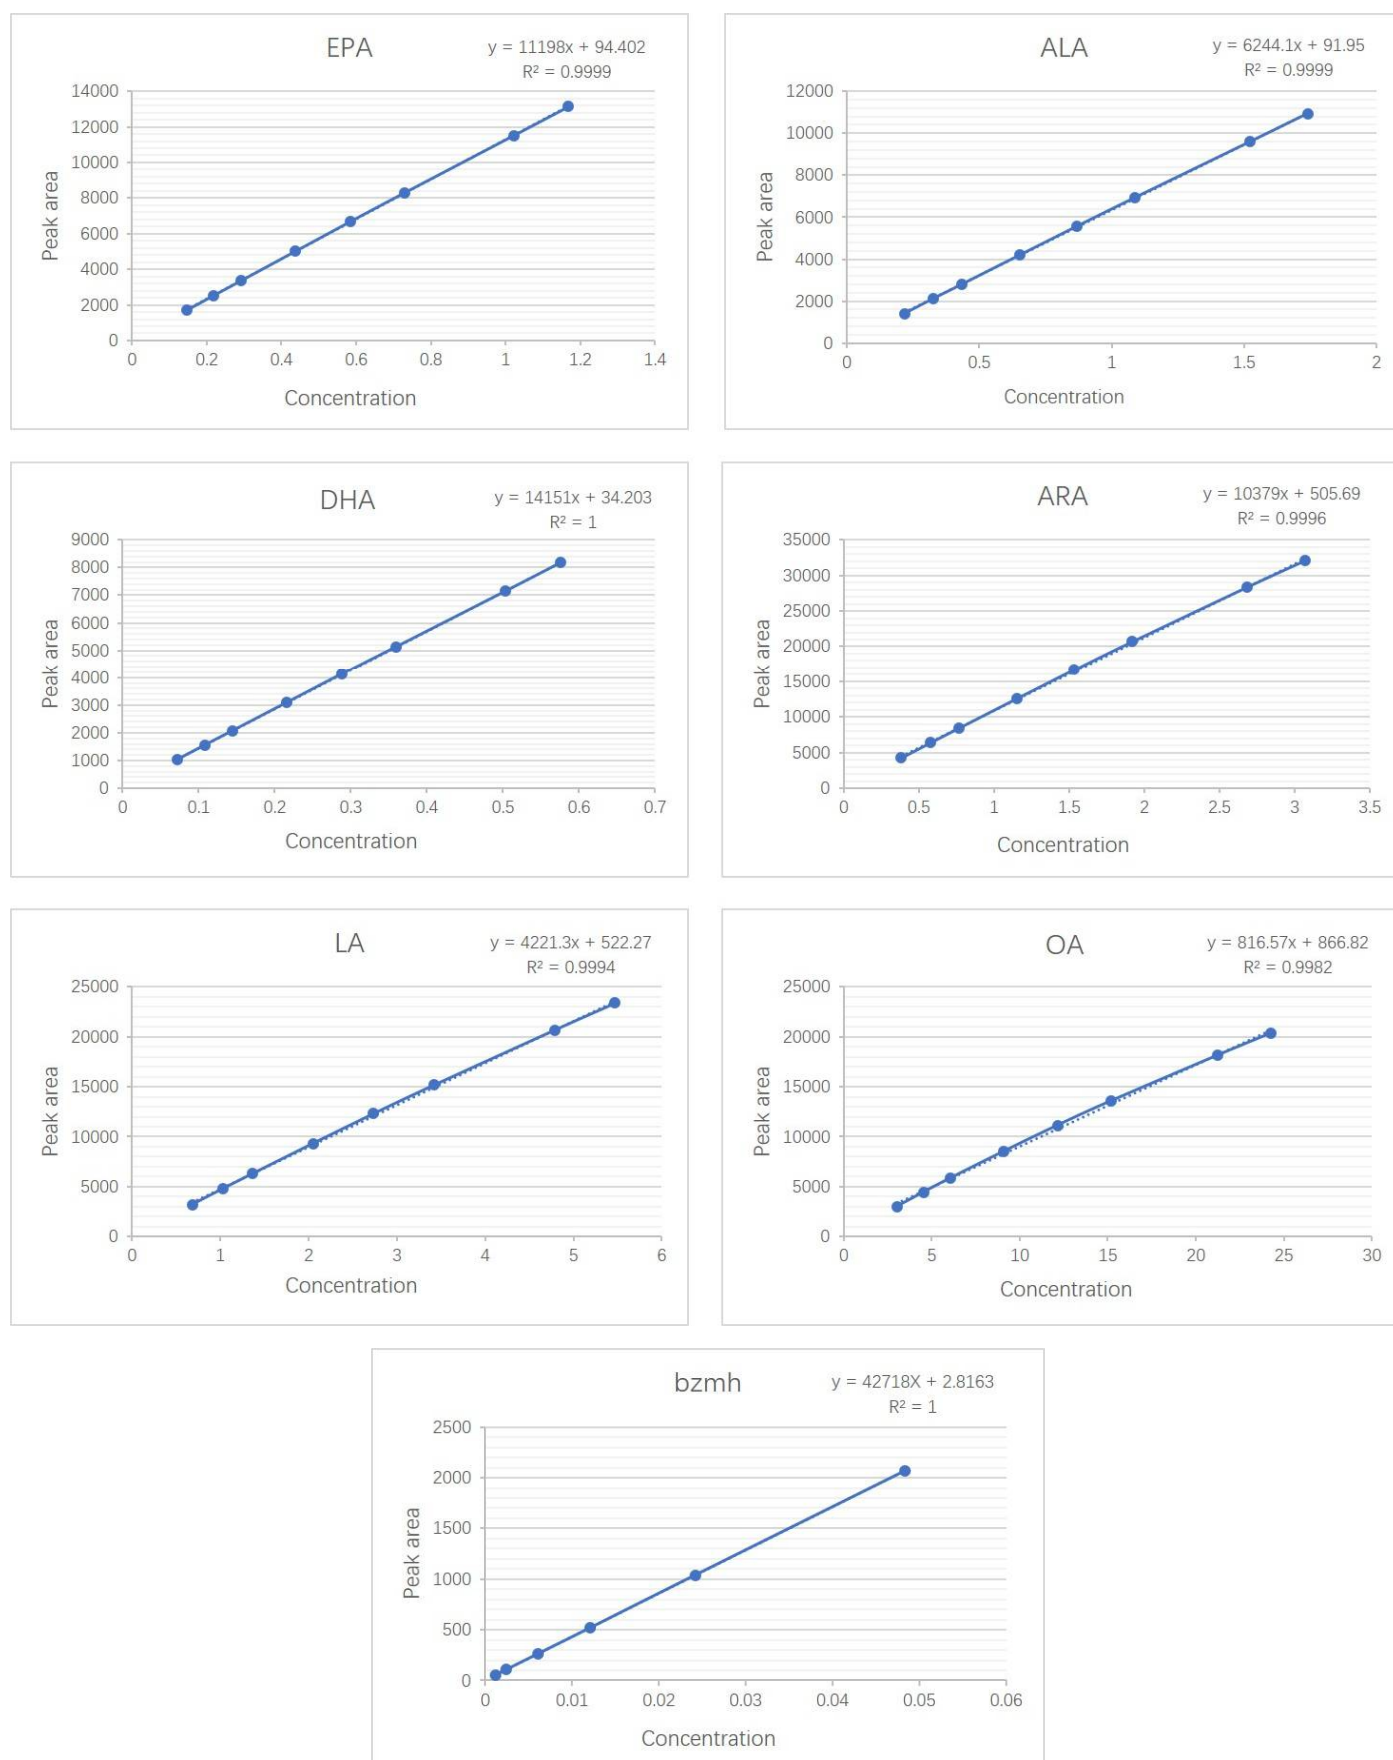

**Figure S1.** The standard curves of eicosapentaenoic acid (EPA),  $\alpha$ -linolenic acid (ALA), docosahexaenoic acid (DHA), arachidonic acid (ARA), linoleic acid (LA), oleic acid (OA) and benzoyl-1-methyl hydantoin (bzmh).

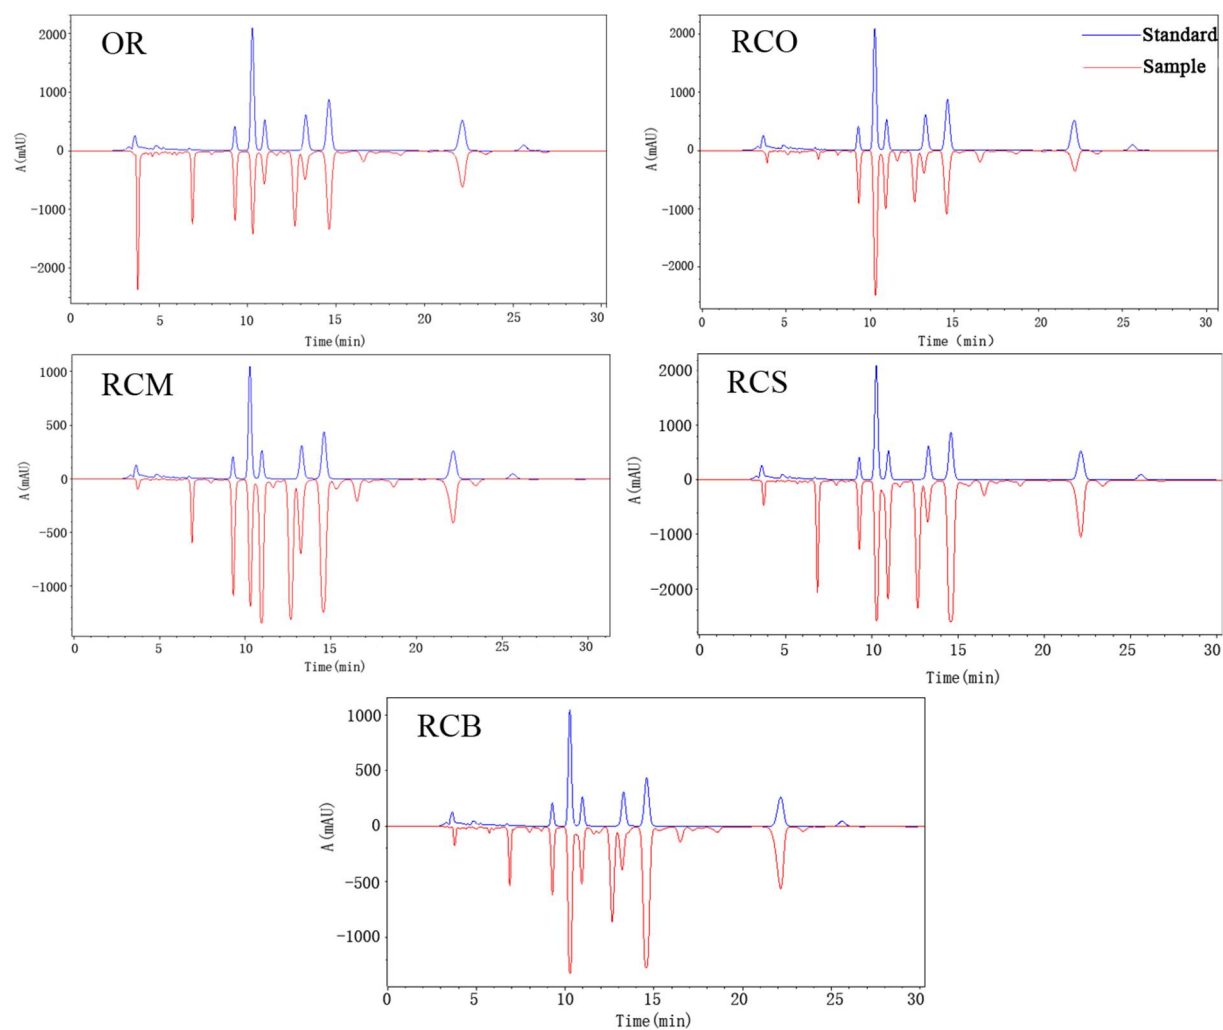

**Figure S2.** Comparison of HPLC chromatograms of mixed standards of six PUFAs to OR, RCO, RCM, and RCS. (OR, *Oviductus Ranae*; RCO, *Rana chensinensis* ovum; RCM, *Rana chensinensis* meat; RCS, *Rana chensinensis* skin; RCB, *Rana chensinensis* bone.)

**Table S1.** The six kinds of polyunsaturated fatty acids (PUFAs).

| PUFAs                          | molecular formula | molecular weight | structure                                                                             |
|--------------------------------|-------------------|------------------|---------------------------------------------------------------------------------------|
| eicosapentaenoic acid (EPA)    | $C_{20}H_{30}O_2$ | 302.45           | 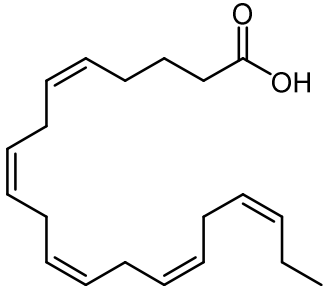   |
| $\alpha$ -linolenic acid (ALA) | $C_{18}H_{30}O_2$ | 278.43           |   |
| docosahexaenoic acid (DHA)     | $C_{22}H_{32}O_2$ | 328.49           |   |
| arachidonic acid (ARA)         | $C_{20}H_{32}O_2$ | 304.46           |  |
| linoleic acid (LA)             | $C_{18}H_{32}O_2$ | 280.44           |  |

oleic acid  
(OA)

$C_{18}H_{34}O_2$

282.46

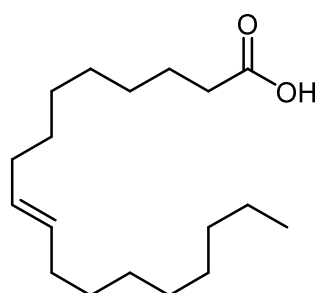

**Table S2.** The methodological verification of HPLC analytical methods of PUFAs. [1, 2]

| Parameter             |                | EPA     | ALA    | DHA     | ARA     | LA      | OA      |
|-----------------------|----------------|---------|--------|---------|---------|---------|---------|
| Precision             | Retention Time | 0.29%   | 0.35%  | 0.38%   | 0.48%   | 0.51%   | 0.65%   |
|                       | RSD            |         |        |         |         |         |         |
| Repeatability         | Area           | 1.90%   | 2.16%  | 3.01%   | 2.90%   | 1.79%   | 1.91%   |
|                       | Retention Time | 1.37%   | 1.04%  | 0.57%   | 1.12%   | 1.03%   | 1.86%   |
|                       | RSD            |         |        |         |         |         |         |
|                       | Area           | 0.73%   | 2.18%  | 3.62%   | 3.28%   | 0.73%   | 1.51%   |
| Stability             | Retention Time | 0.75%   | 0.86%  | 0.90%   | 1.08%   | 1.15%   | 1.35%   |
|                       | RSD            |         |        |         |         |         |         |
|                       | Area           | 0.64%   | 0.74%  | 0.92%   | 0.85%   | 0.21%   | 0.25%   |
|                       | Retention      |         |        |         |         |         |         |
| Accuracy              | Recovery Rate  | 101.62% | 99.00% | 101.18% | 100.20% | 100.30% | 104.14% |
|                       | RSD            | 1.60%   | 1.51%  | 1.62%   | 1.49%   | 1.33%   | 1.88%   |
| Concentration (µg/ml) |                |         |        |         |         |         |         |
| LOD                   |                | 0.07    | 1.17   | 0.20    | 4.76    | 10.23   | 79.75   |
| LOQ                   |                | 0.22    | 3.55   | 0.62    | 14.42   | 30.99   | 241.65  |

RSD, the relative standard deviation.

**Table S3.** The contents of six kinds of PUFAs in OR and their average contents in RCO, RCM, RCS, and RCB in the same *Rana chensinensis*.

| Samples         | EPA<br>(µg/g) | ALA<br>(µg/g) | DHA<br>(µg/g) | ARA<br>(µg/g) | LA<br>(µg/g) | OA<br>(µg/g) |
|-----------------|---------------|---------------|---------------|---------------|--------------|--------------|
| S6-OR           | 225.83        | 542.64        | 476.66        | 337.15        | 1125.04      | 3689.21      |
| S6-other parts  | 404.49        | 3104.62       | 557.05        | 783.55        | 3205.40      | 7250.64      |
| S7-OR           | 201.97        | 113.19        | 419.26        | 393.20        | 539.99       | 1991.06      |
| S7-other parts  | 414.58        | 1278.11       | 475.90        | 698.73        | 2944.95      | 7019.16      |
| S8-OR           | 111.22        | 290.79        | 116.78        | 186.82        | 502.78       | 3573.89      |
| S8-other parts  | 657.19        | 2766.08       | 574.80        | 948.90        | 4010.33      | 8769.26      |
| S9-OR           | 42.82         | 139.38        | 30.93         | 111.14        | 392.40       | 2143.12      |
| S9-other parts  | 580.52        | 3471.14       | 699.41        | 1221.11       | 4822.07      | 11036.88     |
| S10-OR          | 181.06        | 423.00        | 433.85        | 236.41        | 969.03       | 2102.18      |
| S10-other parts | 590.87        | 3503.07       | 736.99        | 1032.46       | 4154.20      | 9965.67      |
| S11-OR          | 207.32        | 498.06        | 115.18        | 404.83        | 1149.15      | 5014.37      |
| S11-other parts | 1300.44       | 3152.37       | 1078.19       | 2037.70       | 4905.07      | 12219.08     |
| S12-OR          | 223.39        | 534.47        | 467.10        | 330.62        | 1104.73      | 3697.32      |
| S12-other parts | 407.91        | 2598.61       | 542.39        | 770.81        | 3041.34      | 6763.91      |
| S13-OR          | 180.86        | 636.19        | 871.61        | 236.82        | 971.12       | 2112.26      |
| S13-other parts | 414.04        | 1233.62       | 527.70        | 746.71        | 3008.18      | 6835.51      |
| S14-OR          | 44.40         | 138.86        | 31.46         | 123.05        | 390.97       | 2135.13      |
| S14-other parts | 559.33        | 3307.33       | 663.87        | 1132.69       | 4345.08      | 9053.96      |
| S15-OR          | 115.37        | 301.15        | 121.18        | 196.38        | 524.04       | 3718.30      |
| S15-other parts | 657.27        | 2736.85       | 572.10        | 978.43        | 4065.38      | 9535.48      |
| S16-OR          | 208.57        | 501.09        | 115.75        | 407.31        | 1155.34      | 5045.92      |
| S16-other parts | 766.31        | 3200.31       | 1363.92       | 1675.03       | 7964.45      | 29899.53     |

## References

1. Guo, H.; Gan, Y.; Liu, M.; Wang, S.; Ni, S.; Zhou, Y.; Xiao, Y.; Wang, Z.; Wang, Y., Quality Evaluation of Oviductus Ranae Based on PUFAs Using HPLC Fingerprint Techniques Combined with Chemometric Methods. *Foods* **2019**, *8*, (8), 322.
2. Wang, S.; Gan, Y.; Kan, H.; Mao, X.; Wang, Y., Exploitation of HPLC Analytical Method for Simultaneous Determination of Six Principal Unsaturated Fatty Acids in Oviductus Ranae Based on Quantitative Analysis of Multi-Components by Single-Marker (QAMS). *Molecules* **2021**, *26*, (2), 1-9.
